# Supplementary material for: Self-assembled anionic and cationic Au nanoparticles with Au nanoclusters for the exploration of different biological responsiveness in cancer therapy
Source: Royal Society of Chemistry journal article supplement (doi:10.1039/d0na01066a), 2021-01-01
Supplement: d0na01066a1.pdf [file d0na01066a1.pdf]

## Supporting Information

### Self-Assembled Anionic and Cation Au Nanoparticles with Au Nanoclusters for Exploration of Different Biological Responsiveness in Cancer Therapy

Jingjing Yang<sup>a</sup>, Lu Zhang<sup>b</sup>, Qian Zhou<sup>c</sup>, Fan Chen<sup>d</sup>, Martina Stenzel<sup>d</sup>, Fucheng Gao<sup>a</sup>, Chao Liu<sup>e</sup>, Huiqing Yuan<sup>b,\*</sup>, Hui Li<sup>a,\*</sup> and Yanyan Jiang<sup>a,f,g\*</sup>

<sup>a</sup> Key Laboratory for Liquid-Solid Structural Evolution and Processing of Materials, Ministry of Education, Shandong University, Jinan, Shandong, China.

<sup>b</sup> Institute of Medical Sciences, the Second Hospital of Shandong University, 247 Beiyuan Dajie Street, Jinan, Shandong, China.

<sup>c</sup> Department of Obstetrics, Shandong Provincial Hospital affiliated to Shandong First Medical University, 324 Jingwu Street, Jinan, Shandong, China.

<sup>d</sup> Centre for Advanced Macromolecular Design (CAMD), School of Chemistry, University of New South Wales, Sydney, NSW 2052, Australia.

<sup>e</sup> Department of Oromaxillofacial Head and Neck Oncology, Shanghai Ninth People's Hospital, College of Stomatology, Shanghai Jiao Tong University School of Medicine, Shanghai, China.

<sup>f</sup> Suzhou Institute of Shandong University, Room 522, Building H of NUSP, NP.388 Ruoshui Road, SIP, Suzhou, Jiangsu, China.

<sup>g</sup> Shenzhen Research Institute of Shandong University, Shenzhen 518057, China.

\*Correspondence: [yanyan.jiang@sdu.edu.cn](mailto:yanyan.jiang@sdu.edu.cn) (Y. J.), [lyuanhq@sdu.edu.cn](mailto:lyuanhq@sdu.edu.cn) (H. Y.), [lihuilmy@hotmail.com](mailto:lihuilmy@hotmail.com) (H. L.)

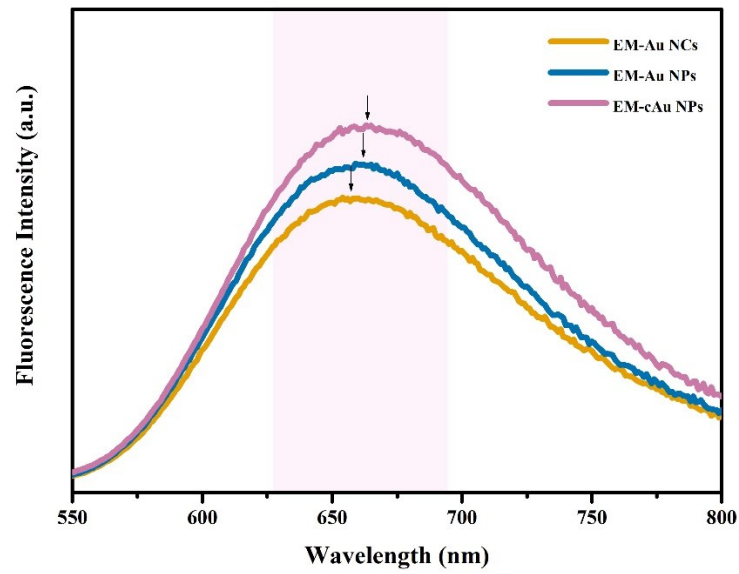

**Figure S1.** Emission spectra with  $\lambda_{\text{ex}} = 365$  nm of Au NCs, self-assembled Au NPs and cAu NPs.

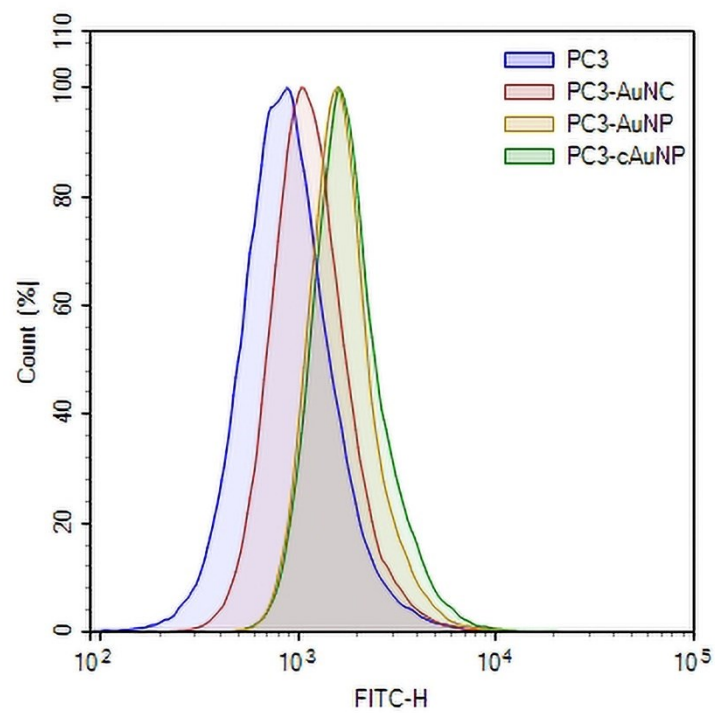

**Figure S2.** Flow cytometry analysis in PC3 cells treated with FITC-Au NCs, FITC-Au NPs and FITC-cAu NPs.
